# Supplementary material
Source: Springer Nature journal article supplement (https://www.springermedizin.de/resource/supplementary/12936_2013_2761_MOESM1_ESM.pdf/9544194)

**A**

| Isolates                  | Signal <sup>18</sup> | EGF-1 | EGF-2 | EGF-3 |     |     |     |     |
|---------------------------|----------------------|-------|-------|-------|-----|-----|-----|-----|
|                           | 2                    | 87    | 97    | 130   | 131 | 132 | 137 | 138 |
| Sal I                     | N                    | Q     | E     | I     | Q   | S   | C   | C   |
| South Korea <sup>1</sup>  | •                    | •     | E/Q   | T     | •   | •   | •   | •   |
| South Korea <sup>2</sup>  | N/D                  | •     | E/Q   | T     | •   | •   | •   | •   |
| North Korea <sup>3</sup>  | •                    | •     | •     | T     | •   | •   | •   | •   |
| China <sup>4</sup>        | •                    | •     | E/Q   | T     | Q/K | •   | •   | •   |
| Iran <sup>5</sup>         | •                    | Q/K   | E/Q   | T     | •   | •   | •   | •   |
| Turkey <sup>6</sup>       | N/D                  | K     | •     | T     | •   | •   | •   | •   |
| India <sup>7</sup>        | •                    | •     | E/Q   | T     | Q/K | •   | C/W | A/G |
| Bangladesh <sup>8</sup>   | •                    | •     | E/Q   | T     | K   | •   | •   | •   |
| Thailand <sup>9</sup>     | •                    | •     | E/Q   | T     | Q/K | •   | •   | •   |
| Indonesia <sup>10</sup>   | •                    | •     | Q     | T     | •   | •   | •   | •   |
| Viet Nam <sup>11</sup>    | N/D                  | •     | •     | T     | •   | •   | •   | •   |
| PNG <sup>12</sup>         | •                    | •     | •     | T     | K   | R   | •   | •   |
| Mexico <sup>13</sup>      | •                    | Q/K   | •     | T     | •   | •   | •   | •   |
| Honduras <sup>14</sup>    | •                    | •     | •     | •     | •   | •   | •   | •   |
| El Salvador <sup>15</sup> | •                    | •     | •     | •     | •   | •   | •   | •   |
| Colombia <sup>16</sup>    | •                    | K     | •     | •     | •   | •   | •   | •   |
| Brazil <sup>17</sup>      | •                    | Q/K   | •     | •     | •   | •   | •   | •   |

**B**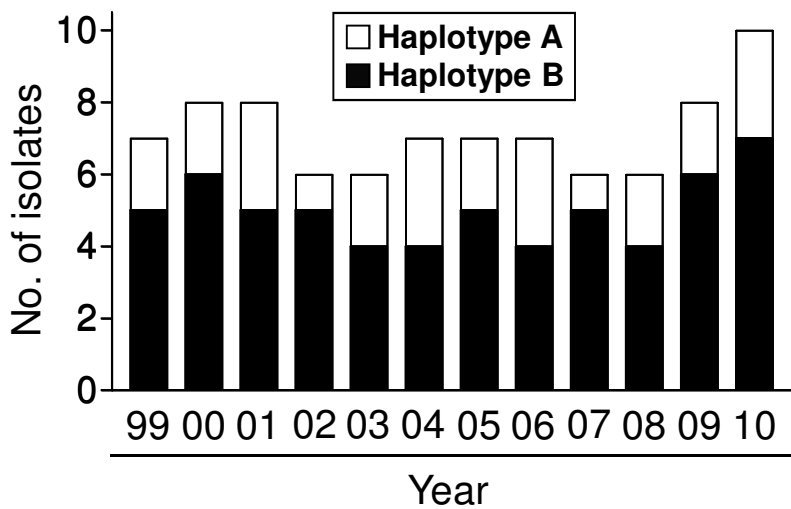

Supplement: MOESM1 [file 9544194]
